# Supplementary material for: Nutrition in Disguise: Effects of Food Neophobia, Healthy Eating Interests and Provision of Health Information on Liking and Perceptions of Nutrient-Dense Foods in Older Adults
Source: PubMed Central journal article supplement (PMC7823595; doi:10.3390/foods10010060), 2020-12-29
Supplement: foods-10-00060-s001.pdf [file foods-10-00060-s001.pdf]

**Table S1: Summary of information provided to participants on healthy/novel ingredients in three foods and their potential health benefits during informed sensory evaluation.**

| <b>Food</b>       | <b>Ingredient</b>                  | <b>Summary of Health Benefits</b>                                                                                                                                                                                                                                                                                                                                     |
|-------------------|------------------------------------|-----------------------------------------------------------------------------------------------------------------------------------------------------------------------------------------------------------------------------------------------------------------------------------------------------------------------------------------------------------------------|
| Lentil brownie    | Lentil puree                       | <ul style="list-style-type: none"> <li>• Contains protein, carbohydrates, fibre, vitamins, minerals and essential amino acids</li> <li>• Lowers cholesterol, risk of heart disease and incidence of certain cancers</li> <li>• Improves type 2 diabetes symptoms</li> </ul>                                                                                           |
|                   | Olive oil as substitute for butter | <ul style="list-style-type: none"> <li>• Healthier oil</li> <li>• Lowers cholesterol, blood sugar, inflammation and swelling</li> <li>• Antioxidants that protect organs from toxins</li> <li>• May improve cognition and reduce risk of dementia</li> <li>• Butter negatively impacts heart health and weight</li> </ul>                                             |
| Mulligatawny soup | Kale powder                        | <ul style="list-style-type: none"> <li>• More concentrated and bioavailable nutrients in powder</li> <li>• Contains vitamins A, C, K and folate, potassium, calcium, magnesium, protein (for muscle mass) and fibre (for gut, heart and immune health)</li> <li>• Antioxidants to protect organs from toxins</li> <li>• May reduce risk of chronic disease</li> </ul> |
|                   | Lentils                            | <ul style="list-style-type: none"> <li>• Contains protein, carbohydrates, fibre, vitamins, minerals and essential amino acids</li> <li>• Lowers cholesterol, risk of heart disease and incidence of certain cancers</li> <li>• Improves type 2 diabetes symptoms</li> </ul>                                                                                           |
|                   | Flax seeds                         | <ul style="list-style-type: none"> <li>• Contains omega-3's and -6's for brain and heart health</li> <li>• Insoluble fibre for overall health</li> <li>• May help metabolize certain hormones and have antioxidants</li> </ul>                                                                                                                                        |
|                   | Chia seeds                         | <ul style="list-style-type: none"> <li>• Lower weight, triglyceride levels and blood sugar</li> <li>• Contain omega-3's (for brain and heart health), protein/amino acids (muscle health) and fibre (overall health), and important minerals like calcium, phosphorus and zinc (bone health)</li> </ul>                                                               |
|                   | Hemp seeds                         | <ul style="list-style-type: none"> <li>• Contain protein (for muscle health), fibre (overall health), B-vitamins (energy, metabolism and brain function), minerals like magnesium, phosphorus and potassium (bone health) and omega-3's and -6's (brain and heart health)</li> </ul>                                                                                  |
|                   | Turmeric                           | <ul style="list-style-type: none"> <li>• Contains curcumin antioxidant to reduce inflammation</li> <li>• May increase short-term memory and prevent formation of brain tangles that cause dementia</li> </ul>                                                                                                                                                         |
|                   |                                    |                                                                                                                                                                                                                                                                                                                                                                       |

|                           |                  |                                                                                                                                                                                                                                                                            |
|---------------------------|------------------|----------------------------------------------------------------------------------------------------------------------------------------------------------------------------------------------------------------------------------------------------------------------------|
|                           | Cinnamon         | <ul style="list-style-type: none"> <li>• Contains polyphenols and cinnamaldehyde which prevent dementia</li> <li>• Polyphenols reduce inflammation and protect against toxins</li> <li>• Cinnamaldehyde prevents formation of brain tangles that cause dementia</li> </ul> |
|                           | Low sodium broth | <ul style="list-style-type: none"> <li>• Lowering sodium consumption helps with hypertension and reduces risk of stroke, heart disease, stomach cancer and osteoporosis</li> <li>• Older adults are at-risk group for problems relating to salt intake</li> </ul>          |
| Raspberry banana smoothie | Raspberries      | <ul style="list-style-type: none"> <li>• Antioxidants that protect against toxins and reduce inflammation that could damage muscles and organs</li> </ul>                                                                                                                  |
|                           | Greek yogurt     | <ul style="list-style-type: none"> <li>• Contains probiotics (for digestive and immune health) and different nutrients (physical and mental health)</li> <li>• Lower risk of osteoporosis, muscle mass loss, frailty and depression</li> </ul>                             |
|                           | Turmeric         | <ul style="list-style-type: none"> <li>• Contains curcumin antioxidant to reduce inflammation</li> <li>• May increase short-term memory and prevent formation of brain tangles that cause dementia</li> </ul>                                                              |
|                           | Honey            | <ul style="list-style-type: none"> <li>• Some anti-bacterial and anti-viral properties</li> <li>• Antioxidants</li> <li>• May lower risk of heart disease and diabetes by lowering cholesterol, triglyceride levels and blood sugar levels</li> </ul>                      |
|                           | Cinnamon         | <ul style="list-style-type: none"> <li>• Contains polyphenols and cinnamaldehyde which prevent dementia</li> <li>• Polyphenols reduce inflammation and protect against toxins</li> <li>• Cinnamaldehyde prevents formation of brain tangles that cause dementia</li> </ul> |
|                           | Hemp oil         | <ul style="list-style-type: none"> <li>• Contains essential fatty acids and omega-3's (for brain and heart health) and important amino acids</li> </ul>                                                                                                                    |
|                           | Skim milk powder | <ul style="list-style-type: none"> <li>• Contains protein (muscle health) and calcium and vitamin D (bone health)</li> </ul>                                                                                                                                               |

---
